# Supplementary material for: Phytochemistry Meets Geochemistry—Blumenol C Sulfate: A New Megastigmane Sulfate from Palicourea luxurians (Rubiaceae: Palicoureeae)
Source: MDPI journal article supplement (doi:10.3390/molecules27217284), 2022-10-26
Supplement: s1 [file s1]

## SUPPLEMENTARY MATERIAL

### **Phytochemistry meets geochemistry—Blumenol C sulfate: A new megastigmane sulfate from *Palicourea luxurians* (Rubiaceae: Palicoureeae)**

Christoph Kornpointner <sup>1,2</sup>, Nadine Hochenegger <sup>2</sup>, Bao-Bao Shi <sup>3</sup>, Andreas Berger <sup>4</sup>, Johannes Theiner <sup>5</sup>, Lothar Brecker <sup>1,\*</sup> and Johann Schinnerl <sup>4,\*</sup>

<sup>1</sup> Department of Organic Chemistry, University of Vienna, Währinger Strasse 38, A-1090 Vienna, Austria.

<sup>2</sup> Institute of Chemical, Environmental and Bioscience Engineering, Technische Universität Wien, Getreidemarkt 9/166, A-1060 Vienna, Austria.

<sup>3</sup> School of Pharmaceutical Sciences, South-Central MinZu University for Nationalities, Wuhan 430074, China

<sup>4</sup> Department of Botany and Biodiversity Research, University of Vienna, Rennweg 14, A-1030 Vienna, Austria.

<sup>5</sup> Microanalysis Services, University of Vienna, Währinger Strasse 42, A-1090 Vienna, Austria.

\* Correspondence:

Johann Schinnerl ([johann.schinnerl@univie.ac.at](mailto:johann.schinnerl@univie.ac.at); Tel.: +43 1 4277 54072)

Lothar Brecker ([lothar.brecker@univie.ac.at](mailto:lothar.brecker@univie.ac.at); Tel.: +43 1 4277 52131)

## Table of Contents

|                                                                                                                                                                                                             |    |
|-------------------------------------------------------------------------------------------------------------------------------------------------------------------------------------------------------------|----|
| <b>Blumenol C sulfate (1)</b> .....                                                                                                                                                                         | 4  |
| <b>Figure S1.</b> <sup>1</sup> H NMR of <b>1</b> in CD <sub>3</sub> OD .....                                                                                                                                | 4  |
| <b>Figure S2.</b> <sup>13</sup> C NMR [APT] of <b>1</b> in CD <sub>3</sub> OD.....                                                                                                                          | 5  |
| <b>Figure S3.</b> COSY of <b>1</b> in CD <sub>3</sub> OD.....                                                                                                                                               | 6  |
| <b>Figure S4.</b> TOCSY of <b>1</b> in CD <sub>3</sub> OD .....                                                                                                                                             | 7  |
| <b>Figure S5.</b> HSQC of <b>1</b> in CD <sub>3</sub> OD.....                                                                                                                                               | 8  |
| <b>Figure S6.</b> HMBC of <b>1</b> in CD <sub>3</sub> OD.....                                                                                                                                               | 9  |
| <b>Figure S7.</b> NOESY of <b>1</b> in CD <sub>3</sub> OD .....                                                                                                                                             | 10 |
| <b>Figure S8.</b> HR-ESI-TOF-MS (negative mode) of <b>1</b> .....                                                                                                                                           | 11 |
| <b>Figure S9.</b> FT IR spectrum of <b>1</b> .....                                                                                                                                                          | 12 |
| <b>Figure S10.</b> Two representative diastereomeric forms <b>6R*9S*-1a</b> and <b>6S*9S*-1b</b><br>used for conformation search based on molecular mechanics with MMFF force fields.....                   | 13 |
| <b>Table S1.</b> DP4+ analysis results of <b>6R*9S*-1a</b> and <b>6S*9S*-1b</b> .....                                                                                                                       | 13 |
| <b>Table S2.</b> Correlations between calculated (DP4+) and experimental <sup>1</sup> H and <sup>13</sup> C NMR<br>chemical shifts of <b>6R*9S*-1a</b> and <b>6S*9S*-1b</b> .....                           | 14 |
| <b>Table S3.</b> M06-2X/Def2SVP optimized lowest energy 3D conformers and energy<br>analysis for compound <b>1</b> .....                                                                                    | 15 |
| <b>Figure S11.</b> Two representative enantiomeric forms ( <b>6S,9S</b> )- <b>1</b> and ( <b>6R,9R</b> )- <b>1</b> used for<br>conformation search based on molecular mechanics with MMFF force fields..... | 16 |
| <b>Blumenol C glucoside</b> .....                                                                                                                                                                           | 17 |
| <b>Figure S12.</b> Structure of blumenol C glucoside .....                                                                                                                                                  | 17 |
| <b>Table S4.</b> <sup>1</sup> H and <sup>13</sup> C NMR spectroscopic data for blumenol C glucoside in CD <sub>3</sub> OD<br>measured on a 600 MHz NMR.....                                                 | 18 |
| <b>Vomifoliol (= blumenol A)</b> .....                                                                                                                                                                      | 19 |
| <b>Figure S13.</b> Structure of vomifoliol.....                                                                                                                                                             | 19 |
| <b>Table S5.</b> <sup>1</sup> H and <sup>13</sup> C NMR of vomifoliol spectroscopic data in CD <sub>3</sub> OD<br>measured on a 600 MHz NMR.....                                                            | 19 |
| <b>Elemental analysis</b> .....                                                                                                                                                                             | 20 |
| <b>Table S6.</b> Detailed microchemical elemental analysis data for sample A–E .....                                                                                                                        | 22 |
| <b>Figure S14.</b> C/H/N/S-Analysis on EA 3000: TCD-trace of a C/H/N/S-run on sample A.....                                                                                                                 | 23 |
| <b>Figure S15.</b> C/H/N/S-Analysis on EA3000: TCD-trace of a C/H/N/S-run on sample C .....                                                                                                                 | 23 |
| <b>Figure S16.</b> O-Analysis on EA3000 combined to the HT 1500 pyrolysis-system:<br>TCD-trace of an analysis-run on sample A .....                                                                         | 24 |

|                                                                                                                                       |    |
|---------------------------------------------------------------------------------------------------------------------------------------|----|
| <b>Figure S17.</b> O-Analysis on EA3000 combined to the HT 1500 pyrolysis-system:                                                     |    |
| TCD-trace of an analysis-run on sample C .....                                                                                        | 24 |
| <b>Figure S18.</b> Comparison of two samples with a 10 $\mu$ M mixed anion standard containing<br>bromide, chloride and sulfate ..... | 25 |
| <b>Figure S19.</b> Calibration for chloride and sulfate .....                                                                         | 26 |
| <b>References</b> .....                                                                                                               | 27 |

**Blumenol C sulfate (1)**

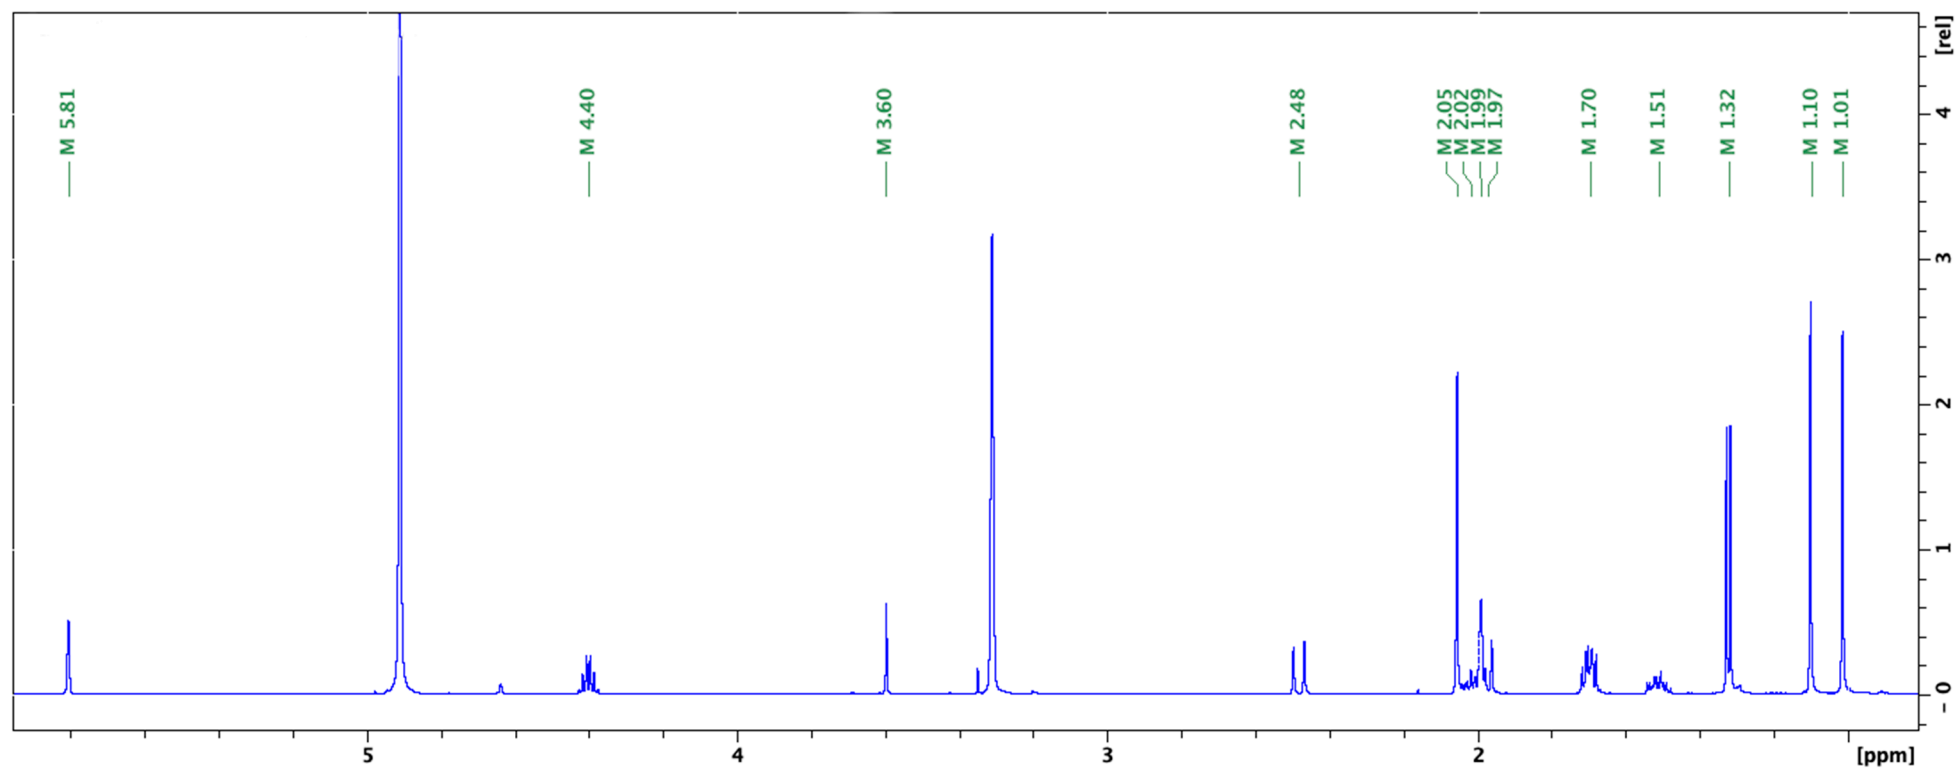

**Figure S1.** <sup>1</sup>H NMR of **1** in CD<sub>3</sub>OD.

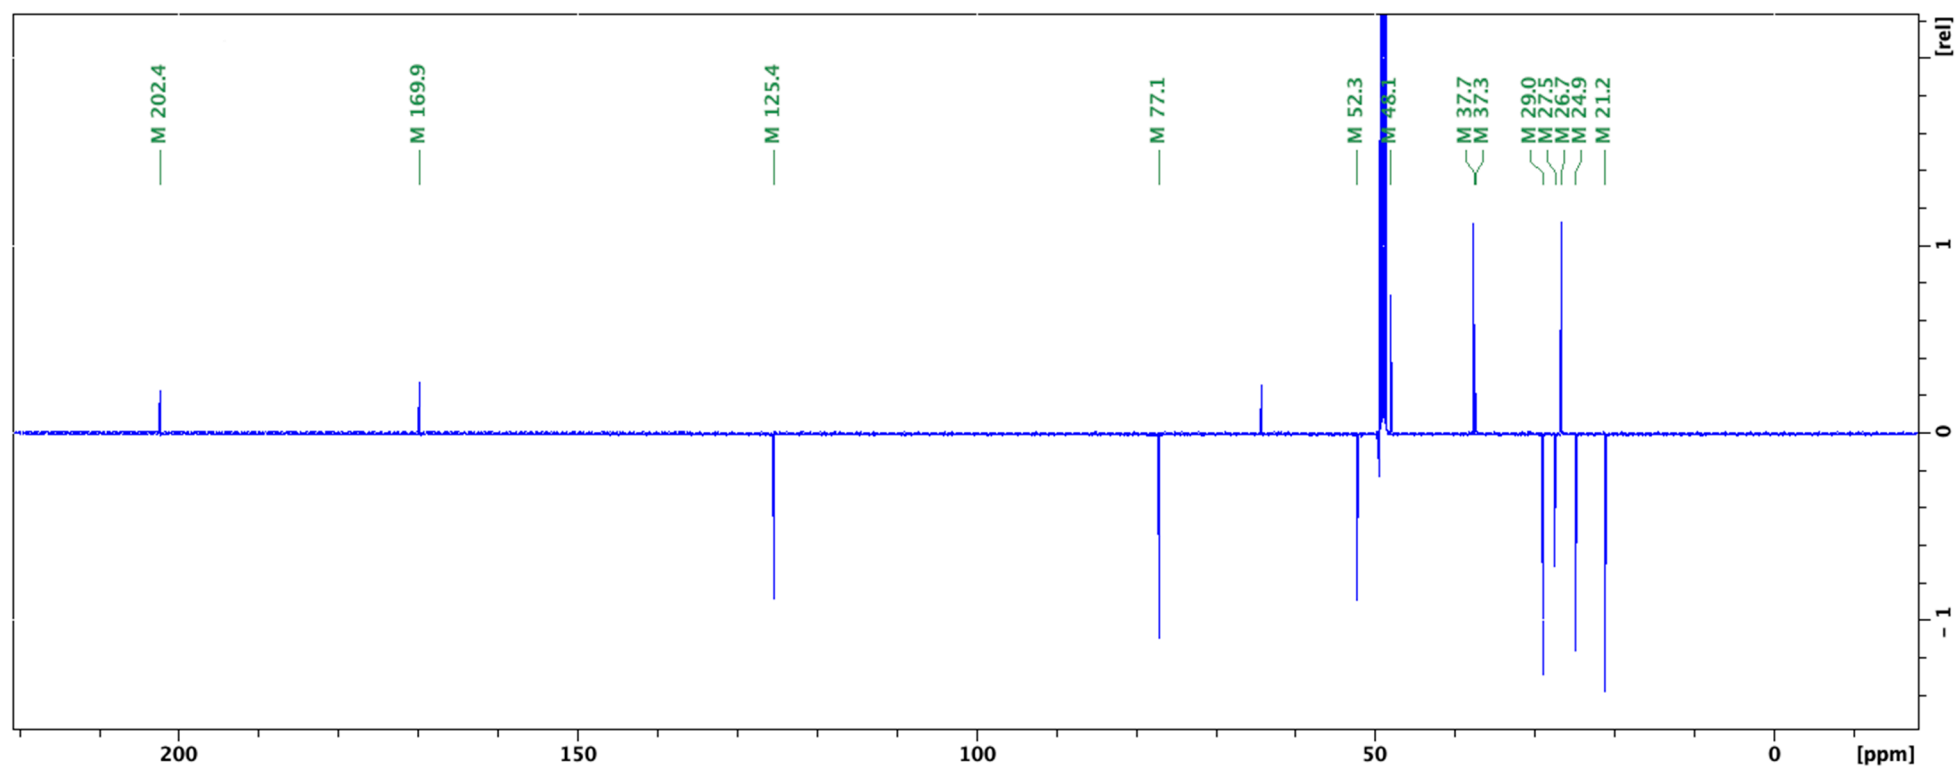

**Figure S2.** <sup>13</sup>C NMR [APT] of **1** in CD<sub>3</sub>OD.

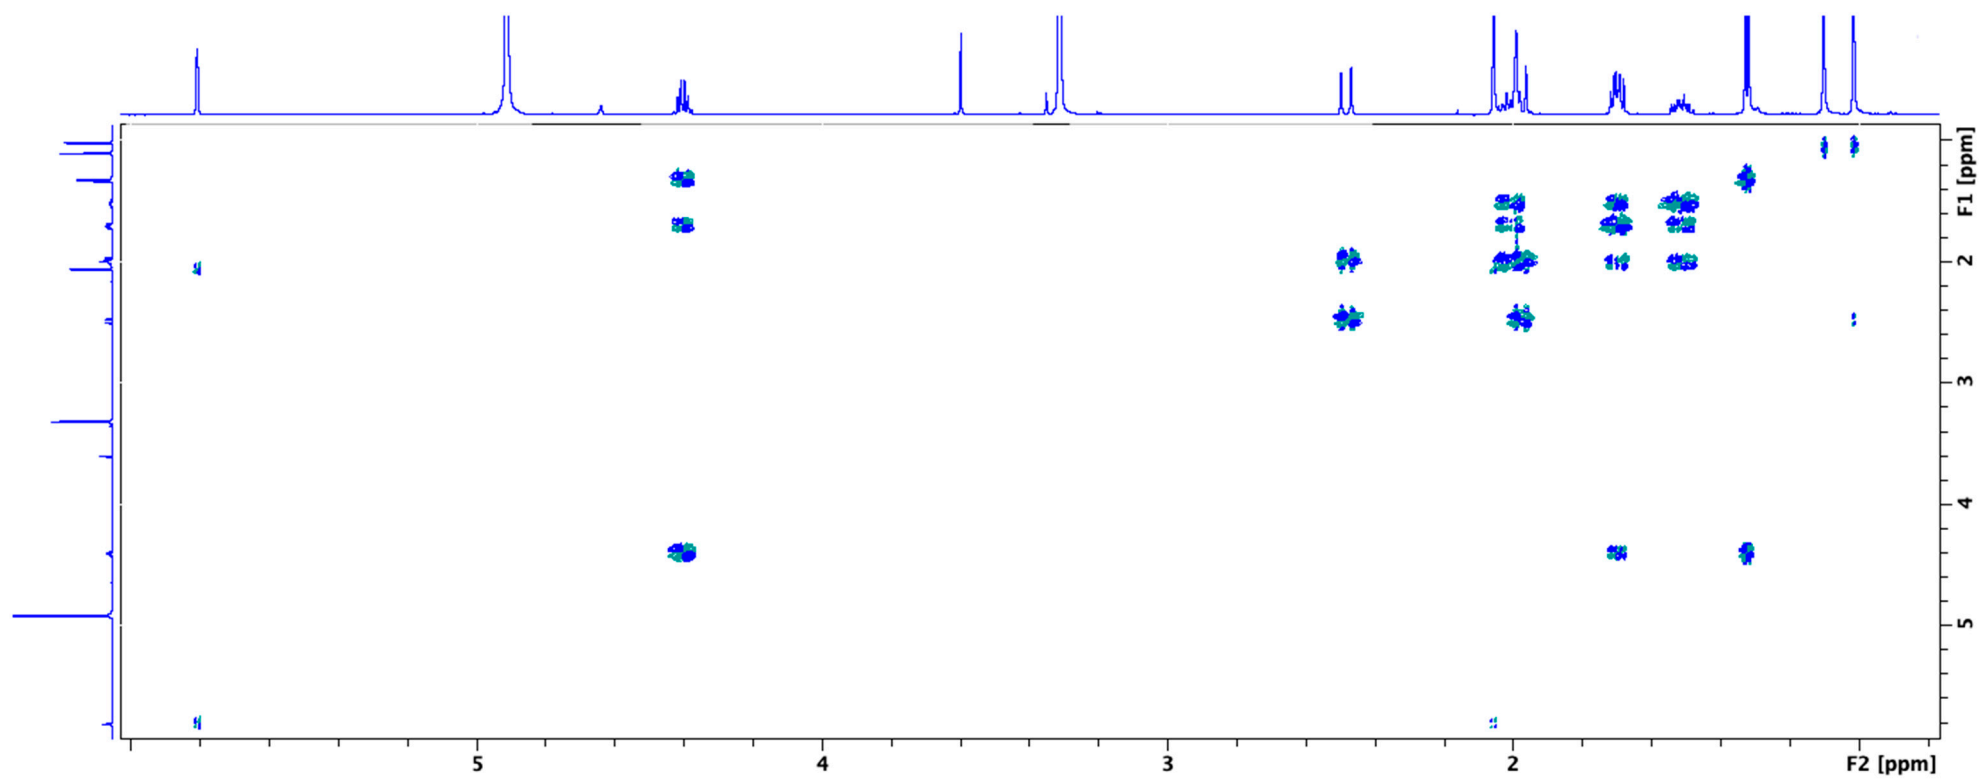

**Figure S3.** COSY of **1** in CD<sub>3</sub>OD.

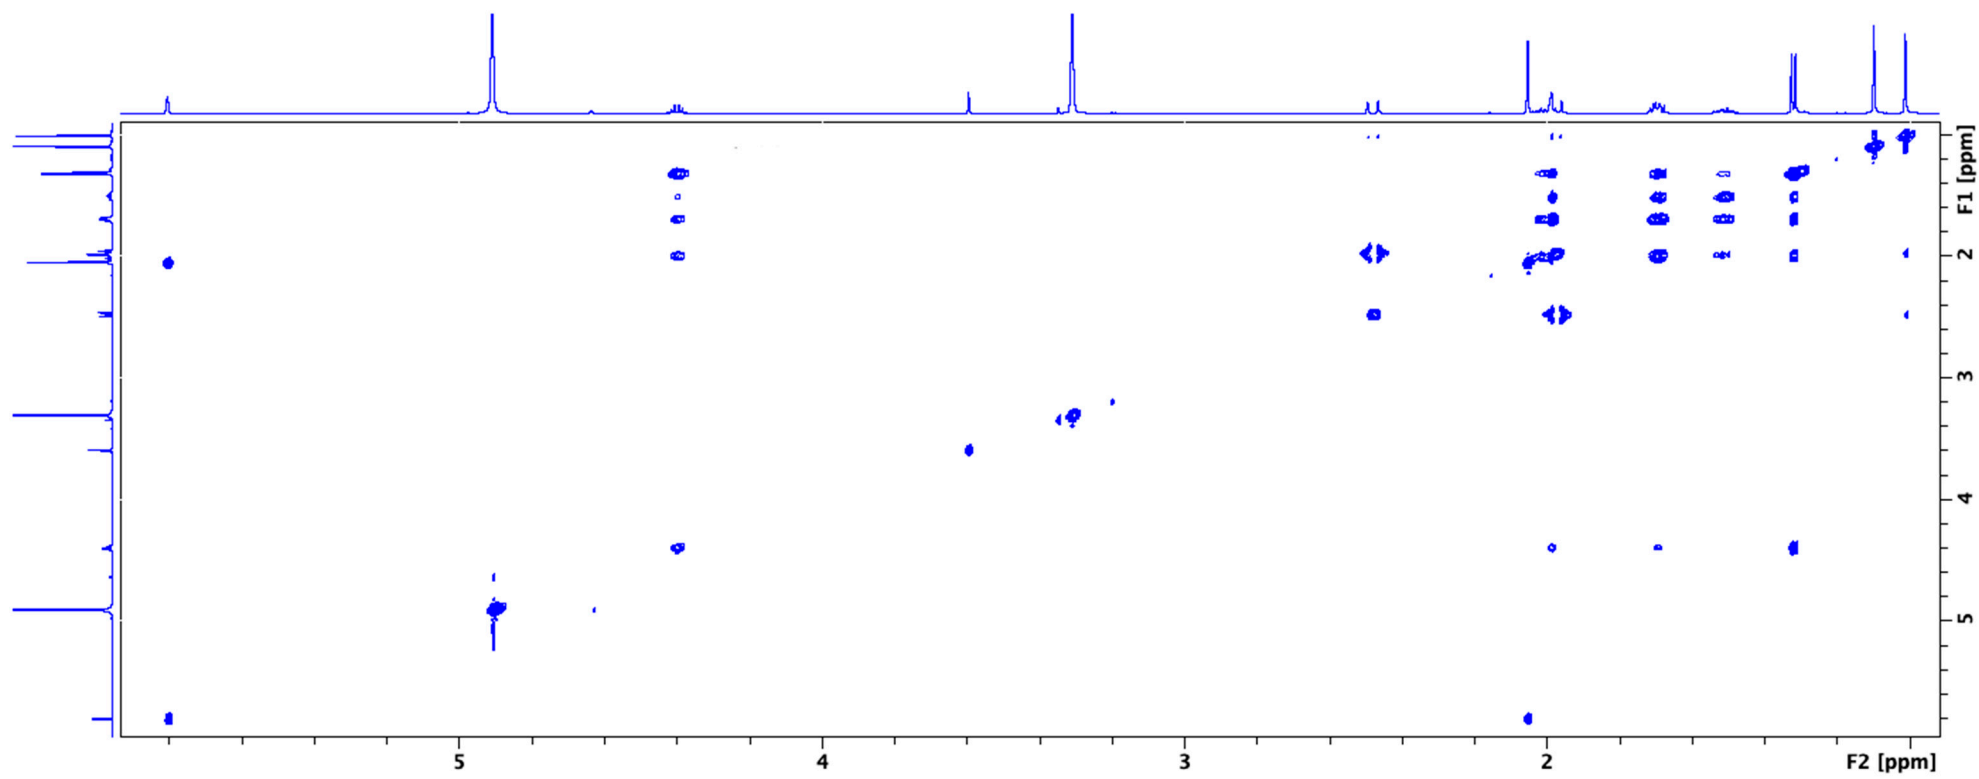

**Figure S4.** TOCSY of **1** in CD<sub>3</sub>OD.

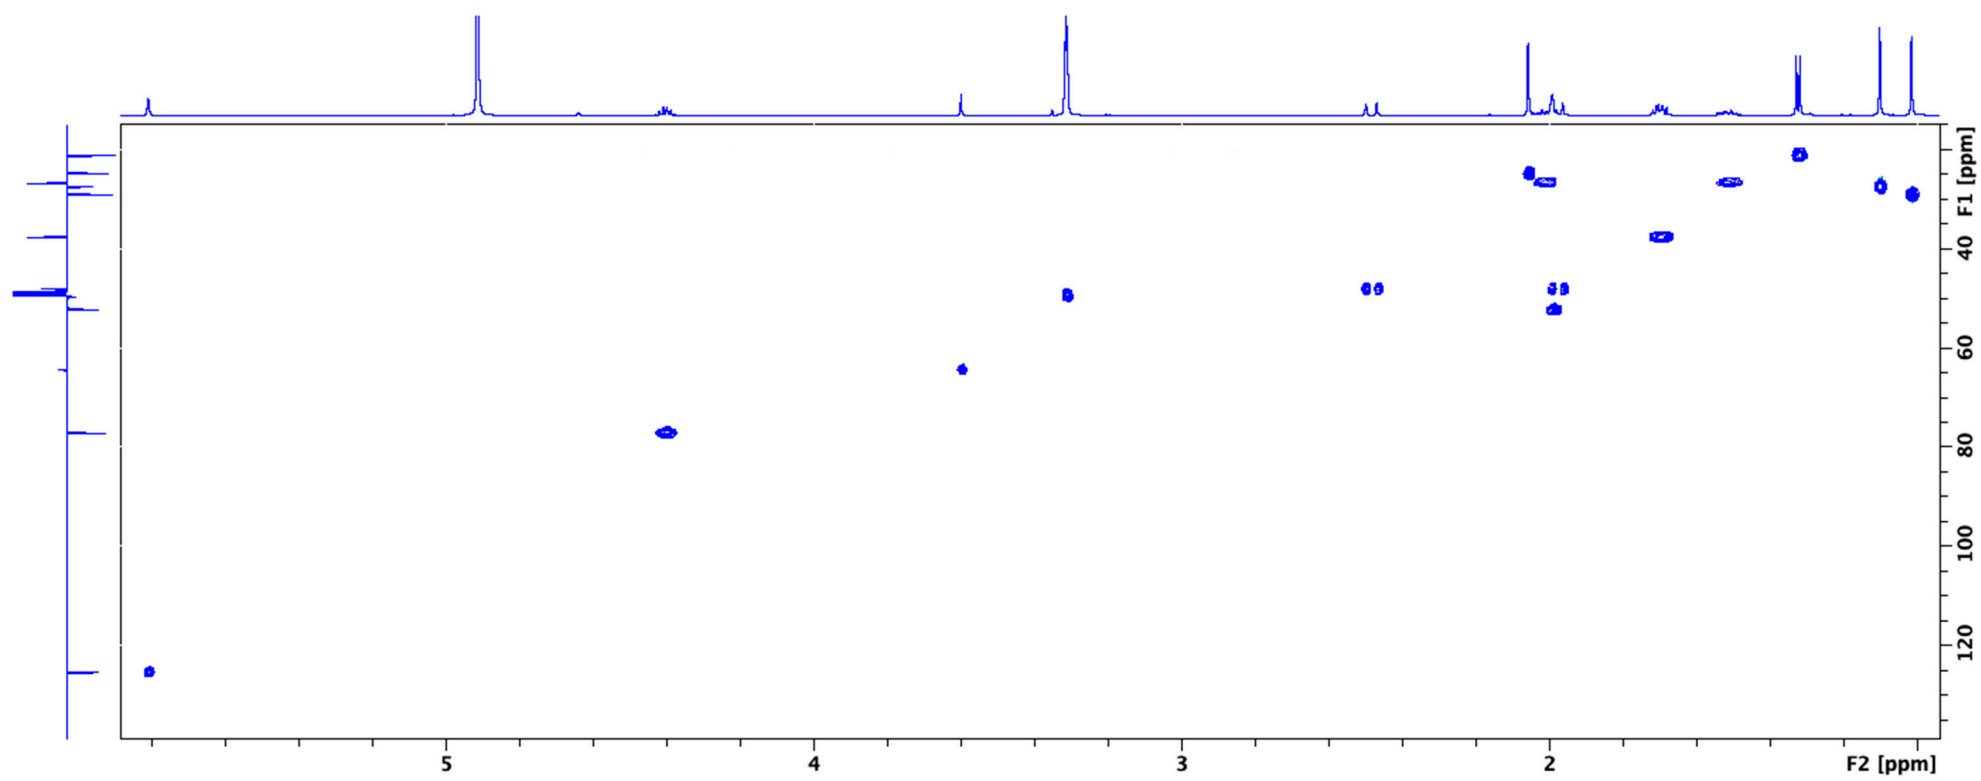

**Figure S5.** HSQC of **1** in CD<sub>3</sub>OD.



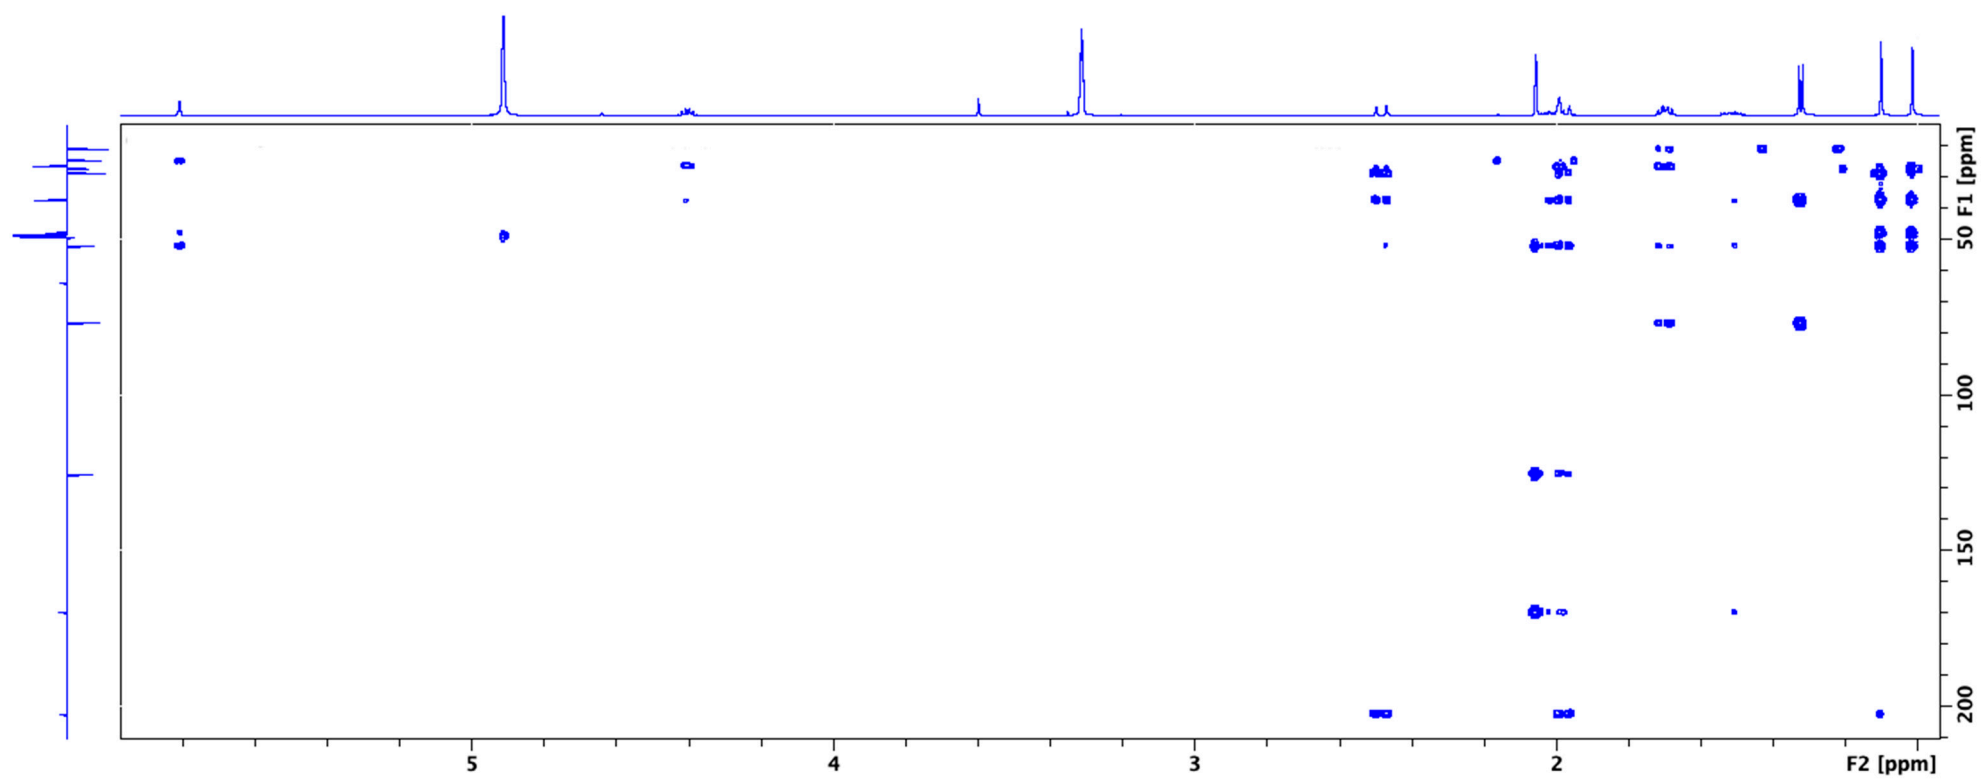

**Figure S6.** HMBC of **1** in  $\text{CD}_3\text{OD}$ .

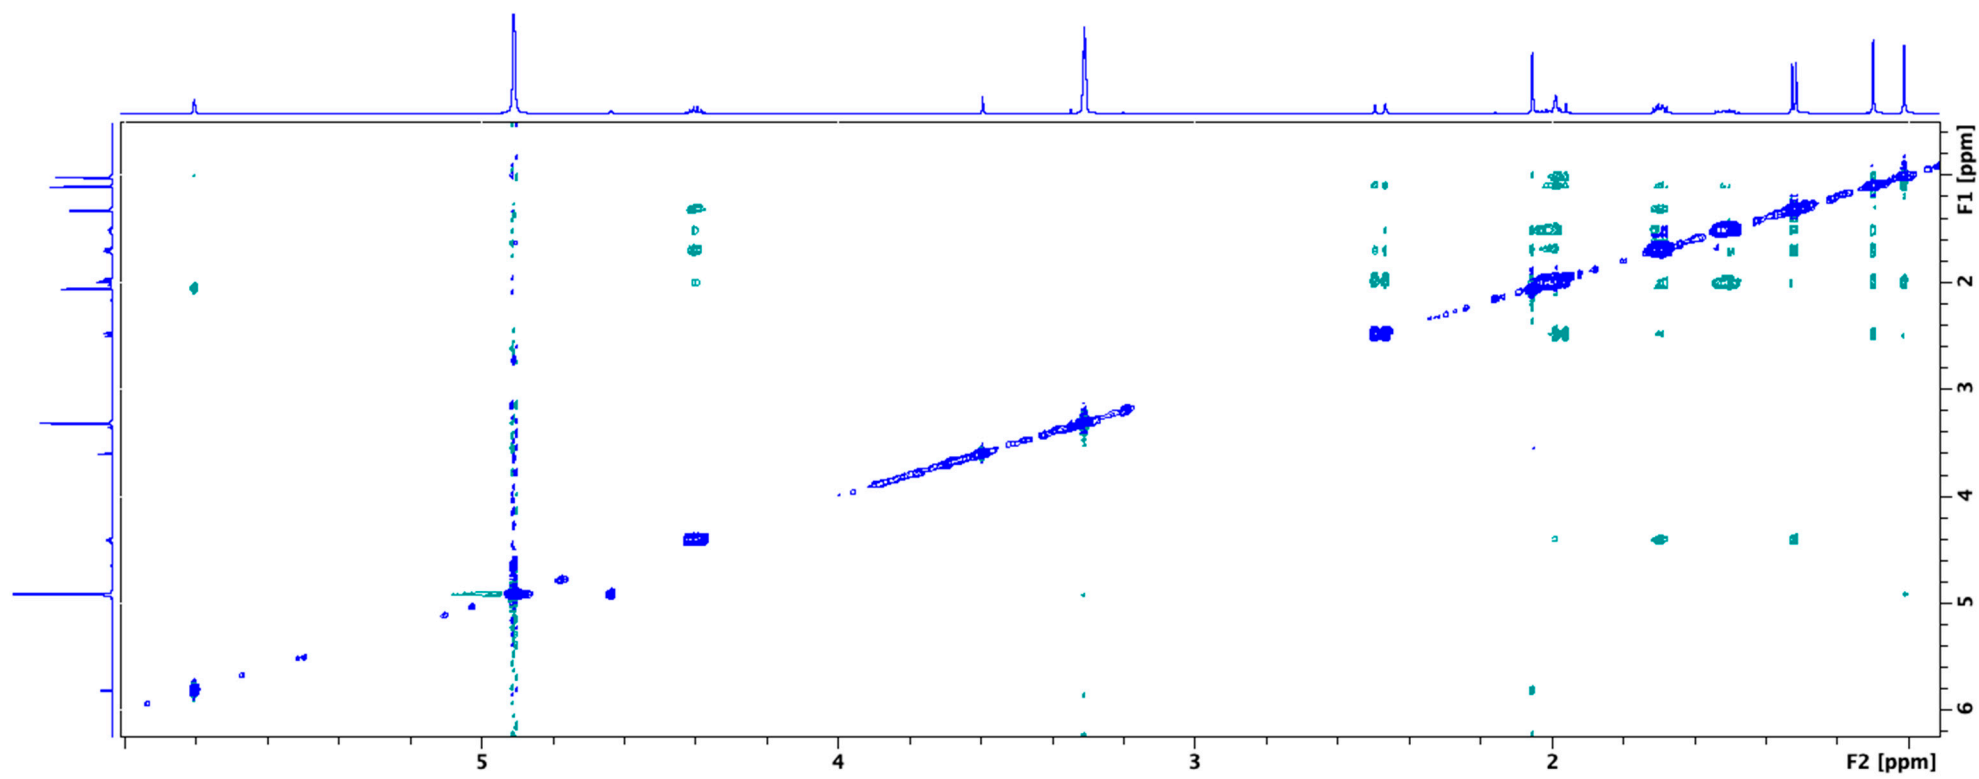

**Figure S7.** NOESY of **1** in CD<sub>3</sub>OD.

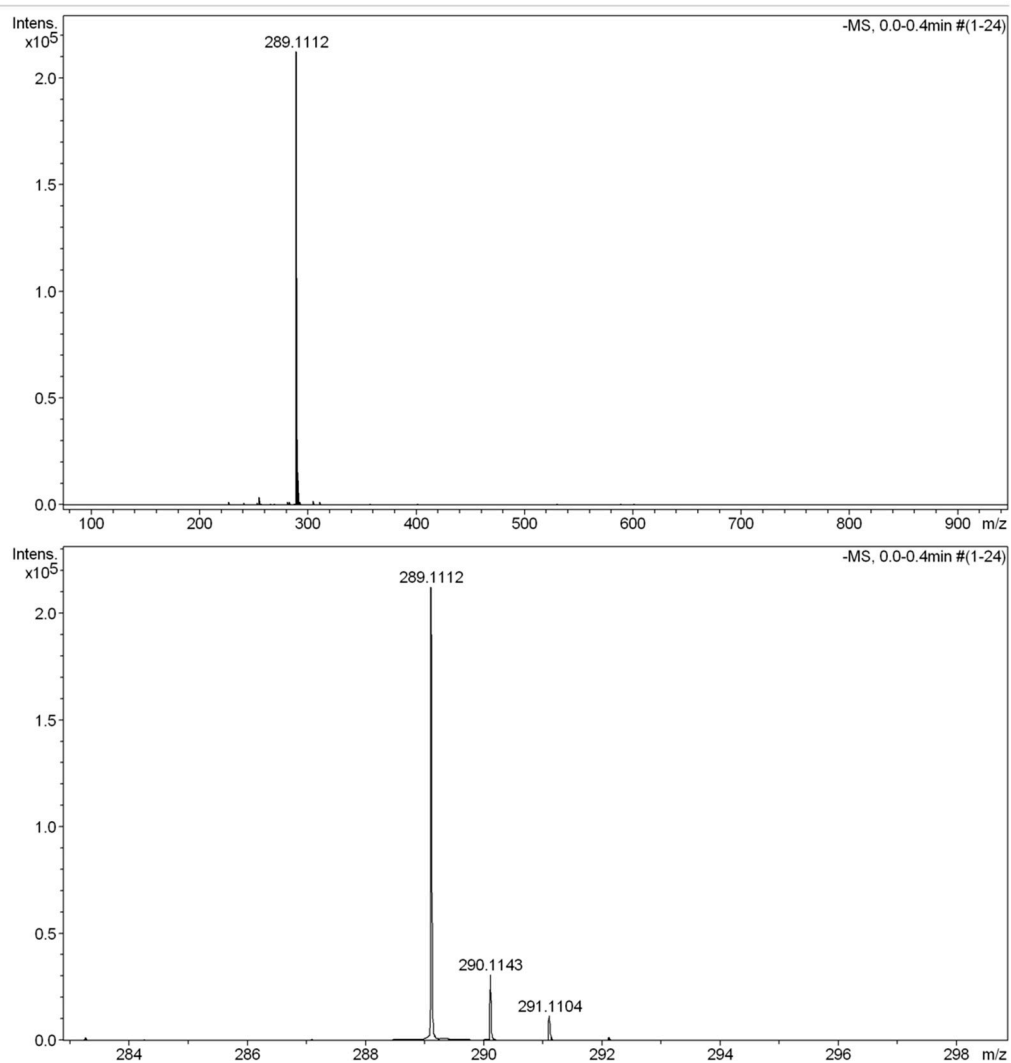

**Figure S8.** HR-ESI-TOF-MS (negative mode) of **1**.

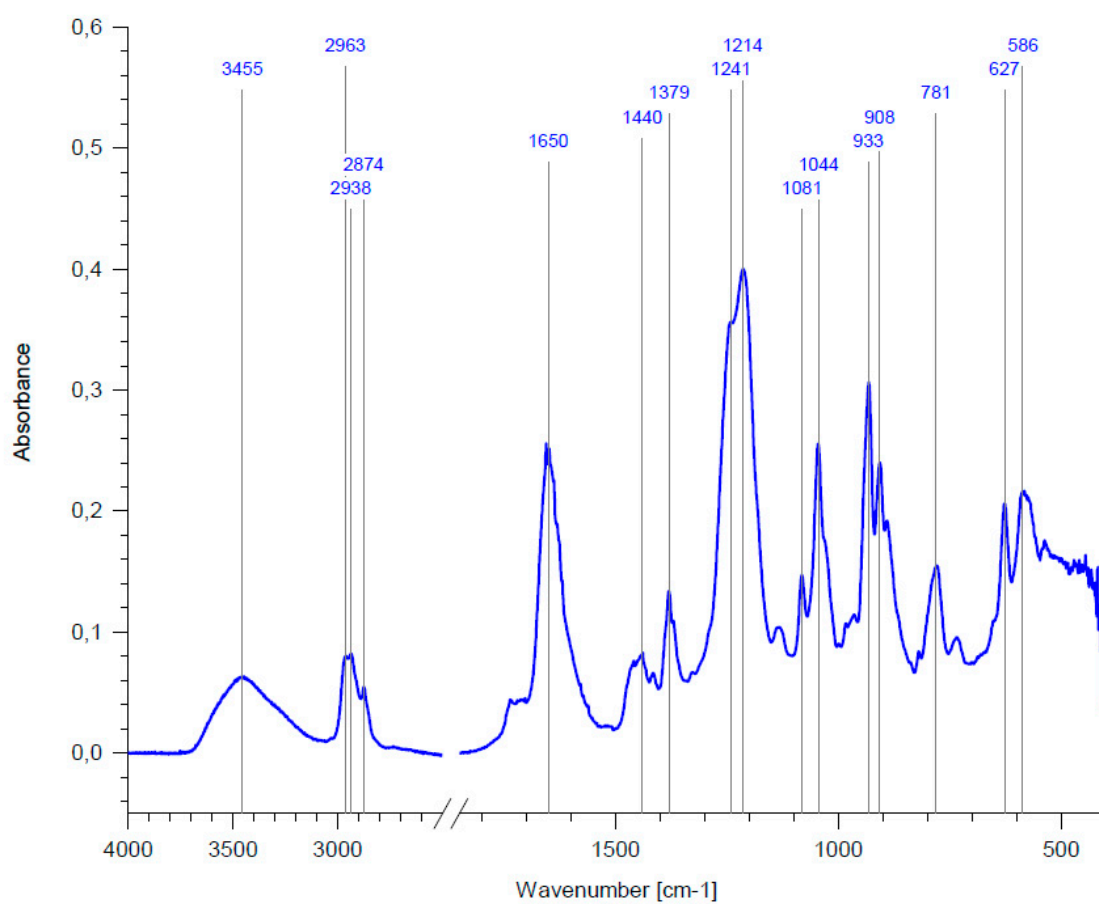

**Figure S9.** FT IR spectrum of **1**.

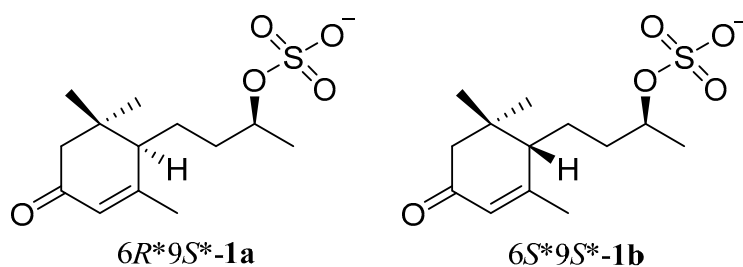

**Figure S10.** Two representative diastereomeric forms **6*R*\*9*S*\*-1a** and **6*S*\*9*S*\*-1b** used for conformation search based on molecular mechanics with MMFF force fields.

**Table S1.** DP4+ analysis results of **6*R*\*9*S*\*-1a** (Isomer 1) and **6*S*\*9*S*\*-1b** (Isomer 2).

| Input            | Isomer 1 (%) | Isomer 2 (%) |
|------------------|--------------|--------------|
| sDP4+ (H data)   | 44.69        | 55.31        |
| sDP4+ (C data)   | 2.36         | 97.64        |
| sDP4+ (all data) | 1.92         | 98.08        |
| uDP4+ (H data)   | 50.57        | 49.43        |
| uDP4+ (C data)   | 50.37        | 49.63        |
| uDP4+ (all data) | 50.94        | 49.06        |
| DP4+ (H data)    | 45.25        | 54.75        |
| DP4+ (C data)    | 2.39         | 97.61        |
| DP4+ (all data)  | 1.99         | 98.01        |

\*Isomers 1 and 2 correlate to Figure S10

**Table S2.** Correlations between calculated (DP4+) and experimental  $^1\text{H}$  and  $^{13}\text{C}$  NMR chemical shifts of 6*R*\*9*S*\*-**1a** (Isomer 1) and 6*S*\*9*S*\*-**1b** (Isomer 2).

| No. | $^{13}\text{C}$ NMR chemical shifts<br>(ppm) |          |          | $^1\text{H}$ NMR chemical shifts<br>(ppm) |          |          |
|-----|----------------------------------------------|----------|----------|-------------------------------------------|----------|----------|
|     | Exp.                                         | Isomer 1 | Isomer 2 | Exp.                                      | Isomer 1 | Isomer 2 |
| 1   | 26.7                                         | 29.1     | 28.0     | 1.99                                      | 2.52     | 2.58     |
| 2   | 29                                           | 30.0     | 28.8     | 2.48                                      | 2.76     | 2.94     |
| 3   | 37.7                                         | 35.6     | 35.3     | 1.97                                      | 2.26     | 2.45     |
| 4   | 77.1                                         | 85.6     | 88.2     | 5.81                                      | 6.42     | 6.20     |
| 5   | 21.2                                         | 23.1     | 21.8     | 1.10                                      | 1.40     | 1.38     |
| 6   | 48.1                                         | 49.0     | 48.6     | 1.01                                      | 1.28     | 1.28     |
| 7   | 202.4                                        | 198.1    | 197.3    | 2.05                                      | 2.41     | 2.49     |
| 8   | 125.4                                        | 119.3    | 123.0    | 1.51                                      | 2.16     | 1.94     |
| 9   | 169.9                                        | 174.6    | 171.5    | 2.02                                      | 2.11     | 2.14     |
| 10  | 52.3                                         | 50.8     | 52.0     | 1.69                                      | 1.96     | 1.92     |
| 11  | 37.3                                         | 42.8     | 40.7     | 4.40                                      | 4.72     | 4.67     |
| 12  | 27.5                                         | 29.7     | 27.7     | 1.32                                      | 1.68     | 1.68     |
| 13  | 24.9                                         | 27.8     | 28.3     | -                                         | -        | -        |

\*Isomers 1 and 2 correlate to Figure S10

**Table S3.** M06-2X/Def2SVP optimized lowest energy 3D conformers and energy analysis for compound **1**.

| No.  | 3D conformers                                                                       | G<br>(Hartree) | $\Delta G$<br>(Kcal/mol) | Boltzmann<br>distribution<br>(%) |
|------|-------------------------------------------------------------------------------------|----------------|--------------------------|----------------------------------|
| 1b-1 | 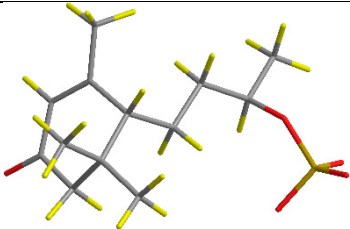   | -1282.2608479  | 0.000000                 | 44.58                            |
| 1b-2 |    | -1282.2608263  | 0.013554                 | 43.57                            |
| 1b-3 |   | -1282.2588708  | 1.24063025               | 5.48                             |
| 1b-4 |  | -1282.2588154  | 1.27539375               | 5.17                             |
| 1b-5 |  | -1282.2574322  | 2.14335175               | 1.19                             |

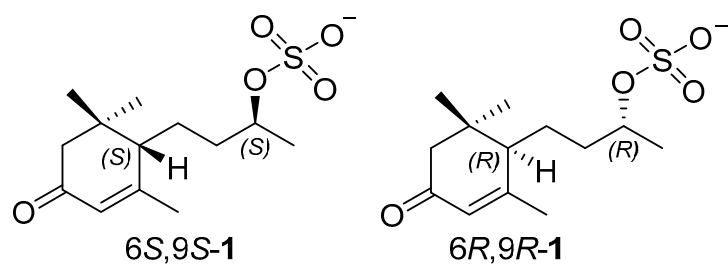

**Figure S11.** Two representative enantiomeric forms (*6S,9S*)-**1** and (*6R,9R*)-**1** used for conformation search based on molecular mechanics with MMFF force fields.



## Blumenol C glucoside

Ground air-dried leaves of *Faramaea tamberlikiana* subsp. *sessifolia* (130 g) were exhaustively extracted with methanol at room temperature ( $3 \times 2$  d) yielding 4 g crude extract. Partitioning was performed as described in the main text for isolation of compound **1** and yielded 1.5 g *n*-butanol phase. This extract was subjected to CC over silica gel 60 (40–60  $\mu$ m particle size) eluted with mixtures of ethyl acetate and methanol. The fraction eluted with 20 % methanol (52.5 mg) was subjected to SEC and final purification by preparative TLC yielded 2.7 mg blumenol C glucoside.

White amorphous powder; MS,  $m/z$ :  $[M+Na]^+$  395.2038 (calcd for  $[M+Na]^+$  395.2040).

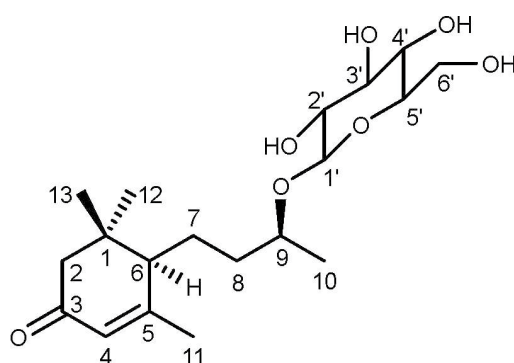

**Figure S12.** Structure of blumenol C glucoside.

**Table S4.**  $^1\text{H}$  and  $^{13}\text{C}$  NMR spectroscopic data for blumenol C glucoside in  $\text{CD}_3\text{OD}$  measured on a 600 MHz NMR. Numbering of carbon atoms is in accordance to Figure S12.

| pos. | $\delta\ ^1\text{H}$ (ppm)                           | $\delta\ ^{13}\text{C}$ (ppm) |
|------|------------------------------------------------------|-------------------------------|
| 1    | -                                                    | 37.6, s                       |
| 2    | 1.98 (d, 1H, 17.7), 2.48 (d, 1H, 17.7)               | 48.2, t                       |
| 3    | -                                                    | 202.5, s                      |
| 4    | 5.80 (m, 1H)                                         | 125.5, d                      |
| 5    | -                                                    | 170.0, s                      |
| 6    | 1.97 (m, 1H)                                         | 52.7, d                       |
| 7    | 1.68 (m, 1H), 1.81 (m, 1H)                           | 26.8, t                       |
| 8    | 1.62 (m, 1H), 1.69 (m, 1H)                           | 37.5, t                       |
| 9    | 3.82 (m, 1H)                                         | 77.7, d                       |
| 10   | 1.25 (d, 3H, 6.3)                                    | 22.0, q                       |
| 11   | 2.04 (d, 3H, 1.3)                                    | 25.1, q                       |
| 12   | 1.02 (s, 3H)                                         | 29.1, q                       |
| 13   | 1.09 (s, 3H)                                         | 27.5, q                       |
| 1'   | 4.31 (1H, d, 8.0)                                    | 104.1, d                      |
| 2'   | 3.15 (1H, dd, 8.7, 8.0)                              | 75.4, d                       |
| 3'   | 3.33 (1H, dd, 8.7, 9.0)                              | 78.4, d                       |
| 4'   | 3.27 (1H, dd, 9.0, 8.4)                              | 71.8, d                       |
| 5'   | 3.25 (1H, m)                                         | 77.9, d                       |
| 6'   | 3.65 (1H, dd, 12.3, 5.7)<br>3.85 (1H, dd, 12.2, 2.3) | 62.9, t                       |

### Vomifoliol (= blumenol A)

Ground air-dried leaves of *Palicourea adusta* (124.5 g) were exhaustively extracted with methanol at room temperature ( $3 \times 2$  d) yielding 6.55 g crude extract which was partitioned as described in the main text for isolation of compound **1**. The chloroform, ethyl acetate and *n*-butanol phases were combined (650 mg) and subjected to repeated CC over silica gel 60 (0.2–0.5 mm particle size) with mixtures of petrol ether, ethyl acetate and methanol (46.1 mg) and 40–60  $\mu\text{m}$  particle size with mixtures of chloroform and methanol. Final purification by preparative TLC afforded 2 mg vomifoliol also known as blumenol A.

White amorphous powder; MS,  $m/z$ :  $[\text{M}+\text{Na}]^+$  247.1302 (calcd for  $[\text{M}+\text{Na}]^+$  247.1304); Optical rotation:  $[\alpha]_{\text{D}}^{20}$  ( $c$  1.8  $\text{mg mL}^{-1}$ ,  $\text{CH}_3\text{OH}$ ) = +93.9°.

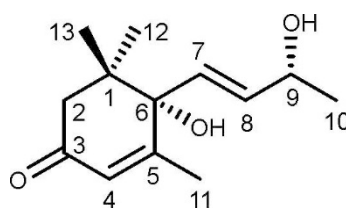

**Figure S13.** Structure of vomifoliol.

**Table S5.**  $^1\text{H}$  and  $^{13}\text{C}$  NMR of vomifoliol spectroscopic data in  $\text{CD}_3\text{OD}$  measured on a 600 MHz NMR. Numbering of carbon atoms is in accordance to Figure S13.

| pos. | $\delta$ $^1\text{H}$ (ppm)            | $\delta$ $^{13}\text{C}$ (ppm) |
|------|----------------------------------------|--------------------------------|
| 1    | -                                      | 42.4, s                        |
| 2    | 2.18 (d, 1H, 17.0), 2.50 (d, 1H, 17.0) | 50.7, t                        |
| 3    | -                                      | 201.3, s                       |
| 4    | 5.89 (m, 1H)                           | 127.2, d                       |
| 5    | -                                      | 167.5, s                       |
| 6    | -                                      | 80.0, s                        |
| 7    | 5.79 (d, 1H, 15.8),                    | 130.0, d                       |
| 8    | 5.82 (dd, 1H, 15.8, 5.1)               | 136.9, d                       |
| 9    | 4.34 (dq, 1H, 5.1, 6.5)                | 68.7, d                        |
| 10   | 1.26 (d, 3H, 6.5)                      | 23.8, q                        |
| 11   | 1.93 (d, 3H, 1.3)                      | 19.6, q                        |
| 12   | 1.06 (s, 3H)                           | 23.4, q                        |
| 13   | 1.03 (s, 3H)                           | 24.5, q                        |

## Elemental analysis

Organic Elemental Micro-Analysis (EA) was originally developed by Fritz Pregl to characterize chemical substances and unveil their molecular composition [S1]. While the substance characterization is nowadays dominated by the subtle information gained by spectroscopic techniques characterization EA contributes complementary information to prove the purity of compounds. EA can also be applied to any material containing even a small fraction of organic substances. Service-requests related to carbon balance in environmental technology and biotechnology have become important applications of EA during the last decades.

The C/H/O-pattern of plant-derived material like the leaves of the investigated plants is generally dominated by the composition of cellulose ( $C_6H_{10}O_5$  – 44.5 w-% C, 6.2 w-% H, 49.3 w-% O). The elements N and S are indicators of proteins and peptides as well as inorganic components ( $NH_4/NO_3$ ,  $SO_4$ ).

Figures S14–S17 show the data in a semi-logarithmic plot to resolve the characteristics of low level signals (base line) and the maximum level data ( $CO_2$ -peak) at the same time. There are four significant peaks assigned to nitrogen ( $N_2$ ), carbon ( $CO_2$ ), hydrogen ( $H_2O$ ) and sulphur ( $SO_2$ ). Numerical integration is done using linear base lines visible in the figures. A blank measurement is compensated by subtracting the trace prior to evaluation and plotting.

The diagrams include the evaluated raw data (area,  $A_X$  [V.s]), and the calibration factors  $f_X$  determined by a moving average model from calibration runs (third line). The blank file number is also indicated in the diagram. The analysis results  $w_X$  [w-%] and the sample weight  $m_0$  [mg] are listed in the second line. Results are computed according to Equation S1.

$$w_X = \frac{f_X \cdot A_X}{m_0} \quad \text{Equ. S1}$$

In oxygen mode two peak areas are visible. The first sometimes splits into a part for hydrogen and nitrogen. Both cannot be used analytically. The third peak is assigned to oxygen (CO). The evaluation is done in the same way using Equation 1. Figures S14 and S15 show the raw data gained by analysis of AB 1 (elevated S-content) and AB 3 (normal S-content). Figures S16 and S17 represent examples from oxygen-determinations at the same two samples.

Ion analysis was done by capillary (free) zone electrophoresis using a CE 7100 system (Agilent). Separation was done at -30 kV along a 45 cm silica capillary with a 50  $\mu$ m bore. The separation was performed at pH 9.1 in a CHES-Arg buffer (50 mM cyclohexylaminen-ethane sulfonic acid, 20 mM L-arginine) containing 1 mM tetradecyl-ammonium hydroxide as EOF modifier. The ion profile was recorded using a TraceDec conductivity detector. Evaluation was done using a series of mixed anion-standards made from 0.1 M stock solutions prepared from high purity chemicals and MilliQ-water. An amount of 1.5 to 2.5 mg of the grinded sample material were extracted with MilliQ-water and analyzed after filtration with 0.4  $\mu$ m membrane filters.

Figure S18 shows the comparison of two samples with a 10  $\mu\text{M}$  mixed anion standard containing bromide, chloride and sulfate. The analyte solutions contained about 2.6 mg of a sample in 50.0 mL water. Quantitative evaluation was based on peak areas. The calibration was based on a standard series from 5 to 100  $\mu\text{Mol L}^{-1}$ . Figure S19 shows the calibration for chloride and sulfate.

**Table S6.** Detailed microchemical elemental analysis data for sample A–E.

| Sample | Anal-No     | w-%C  | w-%H | w-%N | w-%S  | w-%O  | w-%Cl | w-%SO <sub>4</sub> | H:C  | C:N   | C:S    | N:S   | C:O  | C:Cl   | S in SO <sub>4</sub> | Sum   |                 |
|--------|-------------|-------|------|------|-------|-------|-------|--------------------|------|-------|--------|-------|------|--------|----------------------|-------|-----------------|
| A      | 210628/765  | 45,77 | 6,11 | 2,70 | 0,763 |       |       |                    | 1,59 | 19,77 | 160,18 | 8,10  |      |        |                      |       | 1,437 mg        |
|        | 210628/766  | 45,77 | 6,11 | 2,69 | 0,744 |       |       |                    | 1,59 | 19,85 | 164,27 | 8,28  |      |        |                      |       | 1,308 mg        |
|        | 210628/767  | 45,76 | 6,12 | 2,61 | 0,744 |       |       |                    | 1,59 | 20,45 | 164,24 | 8,03  |      |        |                      |       | 2,276 mg        |
|        | 210714/148  |       |      |      |       | 41,72 |       |                    |      |       |        |       | 1,46 |        |                      | 97,02 |                 |
|        | 210714/149  |       |      |      |       | 42,10 |       |                    |      |       |        |       | 1,45 |        |                      | 97,40 |                 |
|        | 210714/150  |       |      |      |       | 40,93 |       |                    |      |       |        |       | 1,49 |        |                      | 96,23 |                 |
|        | 210714/197  |       |      |      |       | 42,26 |       |                    |      |       |        |       | 1,44 |        |                      | 97,56 |                 |
|        | i210714/127 |       |      |      |       |       | 0,584 | 2,23               |      |       |        |       |      |        | 0,743                |       | direct measured |
|        | i210714/220 |       |      |      |       |       | 0,546 | 1,69               |      |       |        |       |      |        | 0,565                |       | X93/739         |
|        | Average     | 45,77 | 6,11 | 2,67 | 0,750 | 41,75 | 0,565 | 1,96               | 1,59 | 20,02 | 162,87 | 8,14  | 1,46 | 239,10 | 0,654                | 97,61 | X93/744         |
|        | $\sigma$    | 0,01  | 0,01 | 0,05 | 0,011 | 0,59  | 0,027 | 0,38               |      |       |        |       |      |        |                      |       |                 |
| B      | 210628/768  | 47,11 | 6,25 | 2,06 | 0,503 |       |       |                    | 1,58 | 26,68 | 250,09 | 9,37  |      |        |                      |       | 1,064 mg        |
|        | 210628/769  | 48,38 | 6,47 | 2,15 | 0,371 |       |       |                    | 1,59 | 26,25 | 348,22 | 13,27 |      |        |                      |       | 1,826 mg        |
|        | 210628/770  | 48,49 | 6,43 | 2,19 | 0,359 |       |       |                    | 1,58 | 25,83 | 360,67 | 13,96 |      |        |                      |       | 1,281 mg        |
|        | 210714/151  |       |      |      |       | 39,63 |       |                    |      |       |        |       | 1,61 |        |                      | 96,55 |                 |
|        | 210714/152  |       |      |      |       | 38,51 |       |                    |      |       |        |       | 1,66 |        |                      | 95,43 |                 |
|        | 210714/153  |       |      |      |       | 39,56 |       |                    |      |       |        |       | 1,62 |        |                      | 96,48 |                 |
|        | 210714/198  |       |      |      |       | 40,70 |       |                    |      |       |        |       | 1,57 |        |                      | 97,62 |                 |
|        | i210714/130 |       |      |      |       |       | 0,260 | 1,54               |      |       |        |       |      |        | 0,515                |       | direct measured |
|        | i210714/223 |       |      |      |       |       | 0,274 | 1,40               |      |       |        |       |      |        | 0,468                |       | X93/740         |
|        | Average     | 47,99 | 6,38 | 2,13 | 0,411 | 39,60 | 0,267 | 1,47               | 1,58 | 26,24 | 311,81 | 11,88 | 1,61 | 530,57 | 0,491                | 96,79 | X93/745         |
|        | $\sigma$    | 0,77  | 0,12 | 0,07 | 0,080 | 0,89  | 0,010 | 0,10               |      |       |        |       |      |        |                      |       |                 |
| C      | 210628/771  | 46,18 | 6,19 | 3,48 | 0,535 |       |       |                    | 1,60 | 15,48 | 230,49 | 14,89 |      |        |                      |       | 1,162 mg        |
|        | 210628/772  | 46,07 | 6,24 | 3,33 | 0,532 |       |       |                    | 1,61 | 16,14 | 231,24 | 14,33 |      |        |                      |       | 2,019 mg        |
|        | 210628/773  | 45,95 | 6,19 | 3,32 | 0,537 |       |       |                    | 1,61 | 16,15 | 228,49 | 14,15 |      |        |                      |       | 1,403 mg        |
|        | 210714/154  |       |      |      |       | 40,08 |       |                    |      |       |        |       | 1,53 |        |                      | 96,26 |                 |
|        | 210714/155  |       |      |      |       | 39,62 |       |                    |      |       |        |       | 1,55 |        |                      | 95,80 |                 |
|        | 210714/156  |       |      |      |       | 40,04 |       |                    |      |       |        |       | 1,53 |        |                      | 96,22 |                 |
|        | 210714/199  |       |      |      |       | 41,63 |       |                    |      |       |        |       | 1,47 |        |                      | 97,81 |                 |
|        | i210714/133 |       |      |      |       |       | 0,116 | 0,28               |      |       |        |       |      |        | 0,092                |       | direct measured |
|        | i210714/226 |       |      |      |       |       | 0,171 | 0,48               |      |       |        |       |      |        | 0,159                |       | X93/741         |
|        | Average     | 46,07 | 6,21 | 3,38 | 0,535 | 40,34 | 0,144 | 0,38               | 1,61 | 15,91 | 230,07 | 14,46 | 1,52 | 947,56 | 0,125                | 96,67 | X93/746         |
|        | $\sigma$    | 0,12  | 0,03 | 0,09 | 0,003 | 0,88  | 0,039 | 0,14               |      |       |        |       |      |        |                      |       |                 |
| D      | 210628/774  | 46,10 | 6,32 | 4,17 | 0,549 |       |       |                    | 1,63 | 12,90 | 224,23 | 17,39 |      |        |                      |       | 1,322 mg        |
|        | 210628/775  | 46,24 | 6,34 | 4,13 | 0,545 |       |       |                    | 1,63 | 13,06 | 226,56 | 17,35 |      |        |                      |       | 1,676 mg        |
|        | 210628/776  | 48,88 | 6,74 | 4,14 | 0,570 |       |       |                    | 1,64 | 13,77 | 228,99 | 16,63 |      |        |                      |       | 1,792 mg        |
|        | 210714/157  |       |      |      |       | 38,61 |       |                    |      |       |        |       | 1,62 |        |                      | 96,85 |                 |
|        | 210714/158  |       |      |      |       | 38,00 |       |                    |      |       |        |       | 1,65 |        |                      | 96,24 |                 |
|        | 210714/159  |       |      |      |       | 38,90 |       |                    |      |       |        |       | 1,61 |        |                      | 97,14 |                 |
|        | 210714/200  |       |      |      |       | 40,19 |       |                    |      |       |        |       | 1,56 |        |                      | 98,43 |                 |
|        | i210714/136 |       |      |      |       |       | 0,425 | < 0,05             |      |       |        |       |      |        |                      |       | direct measured |
|        | i210714/229 |       |      |      |       |       | 0,332 | < 0,05             |      |       |        |       |      |        |                      |       | X93/742         |
|        | Average     | 47,07 | 6,47 | 4,15 | 0,555 | 38,93 | 0,379 | < 0,05             | 1,64 | 13,24 | 226,62 | 17,11 | 1,61 | 367,10 |                      | 97,54 | X93/747         |
|        | $\sigma$    | 1,57  | 0,24 | 0,02 | 0,013 | 0,92  | 0,066 |                    |      |       |        |       |      |        |                      |       |                 |
| E      | 210628/777  | 47,02 | 6,46 | 3,33 | 0,385 |       |       |                    | 1,64 | 16,47 | 326,12 | 19,80 |      |        |                      |       | 1,461 mg        |
|        | 210628/778  | 47,20 | 6,41 | 3,37 | 0,386 |       |       |                    | 1,62 | 16,34 | 326,52 | 19,98 |      |        |                      |       | 1,326 mg        |
|        | 210628/779  | 47,45 | 6,52 | 3,38 | 0,392 |       |       |                    | 1,64 | 16,38 | 323,23 | 19,74 |      |        |                      |       | 1,660 mg        |
|        | 210714/160  |       |      |      |       | 39,66 |       |                    |      |       |        |       | 1,59 |        |                      | 97,09 |                 |
|        | 210714/161  |       |      |      |       | 39,38 |       |                    |      |       |        |       | 1,60 |        |                      | 96,81 |                 |
|        | 210714/162  |       |      |      |       | 39,29 |       |                    |      |       |        |       | 1,60 |        |                      | 96,72 |                 |
|        | i210714/139 |       |      |      |       |       | 0,321 | < 0,05             |      |       |        |       |      |        |                      |       | X93/743         |
|        | i210714/232 |       |      |      |       |       | 0,306 | < 0,05             |      |       |        |       |      |        |                      |       | X93/748         |
|        | Average     | 47,22 | 6,46 | 3,36 | 0,388 | 39,44 | 0,314 | < 0,05             | 1,63 | 16,40 | 325,28 | 19,84 | 1,59 | 444,62 |                      | 97,19 |                 |
|        | $\sigma$    | 0,22  | 0,06 | 0,03 | 0,004 | 0,19  | 0,011 |                    |      |       |        |       |      |        |                      |       |                 |
|        | theory      |       |      |      |       |       |       |                    |      |       |        |       |      |        |                      | 0,00  |                 |

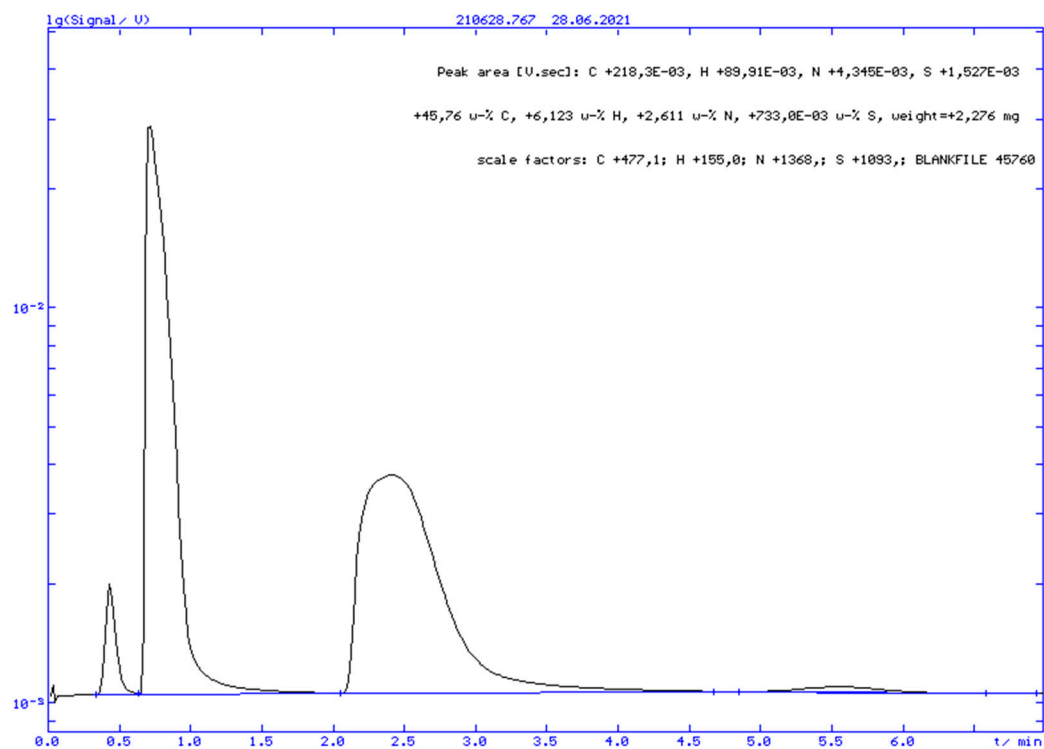

**Figure S14.** C/H/N/S-Analysis on EA 3000: TCD-trace of a C/H/N/S-run on sample A.

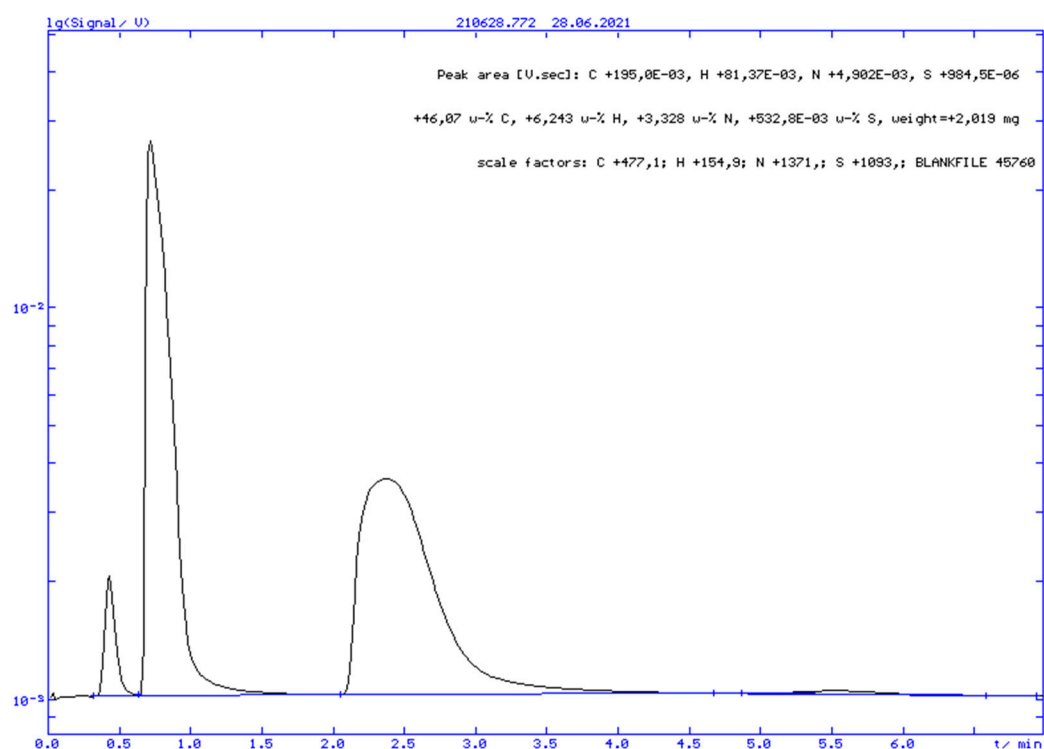

**Figure S15.** C/H/N/S-Analysis on EA3000: TCD-trace of a C/H/N/S-run on sample C.

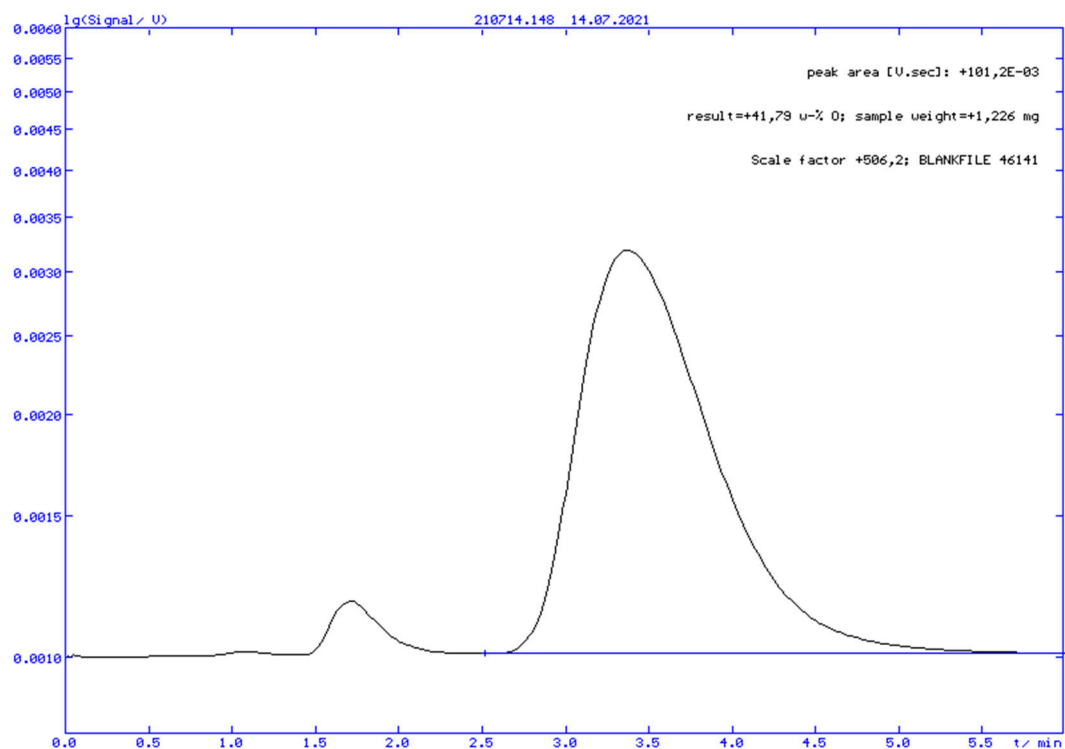

**Figure S16.** O-Analysis on EA3000 combined to the HT 1500 pyrolysis-system: TCD-trace of an analysis-run on sample A.

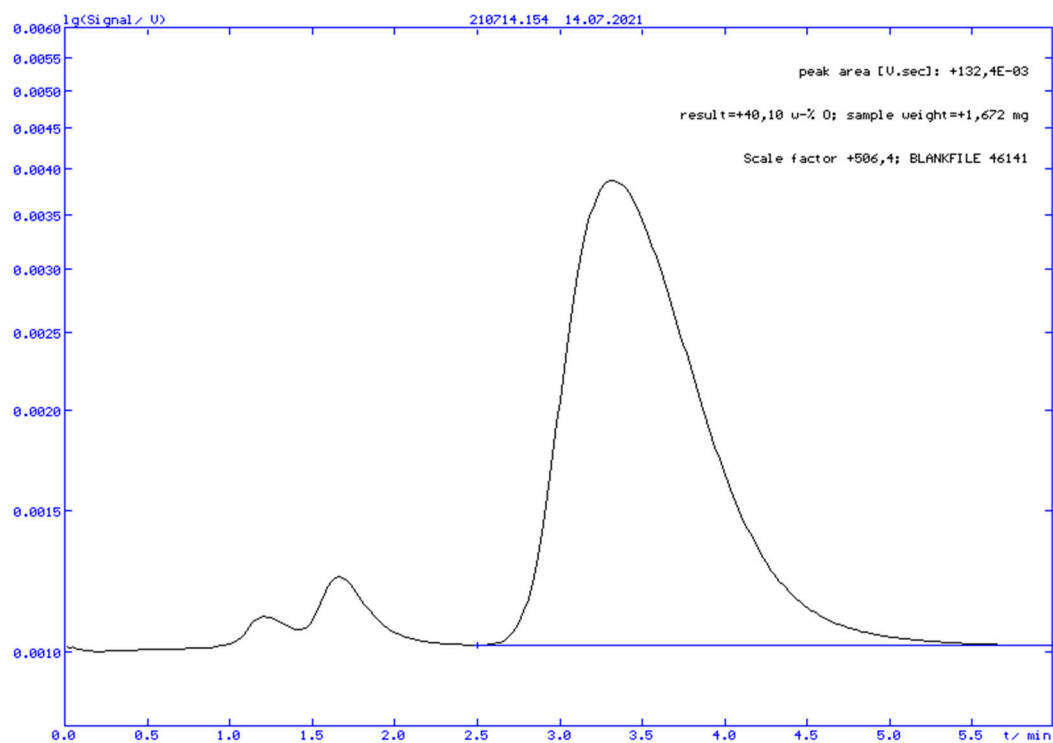

**Figure S17.** O-Analysis on EA3000 combined to the HT 1500 pyrolysis-system: TCD-trace of an analysis-run on sample C.



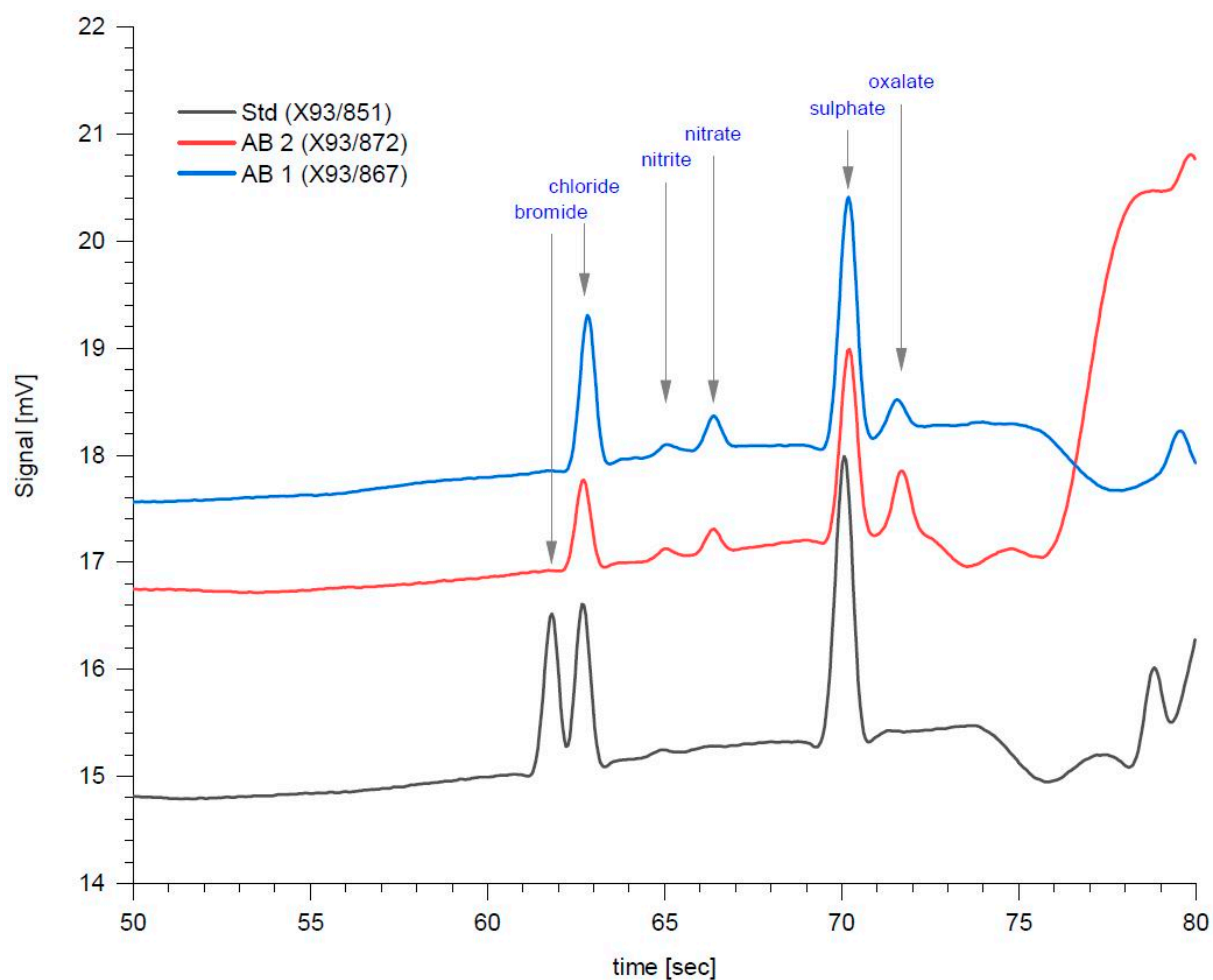

**Figure S18.** Comparison of two samples [A  $\equiv$  AB1; B  $\equiv$  AB2] with a 10  $\mu$ M mixed anion standard containing bromide, chloride and sulfate.

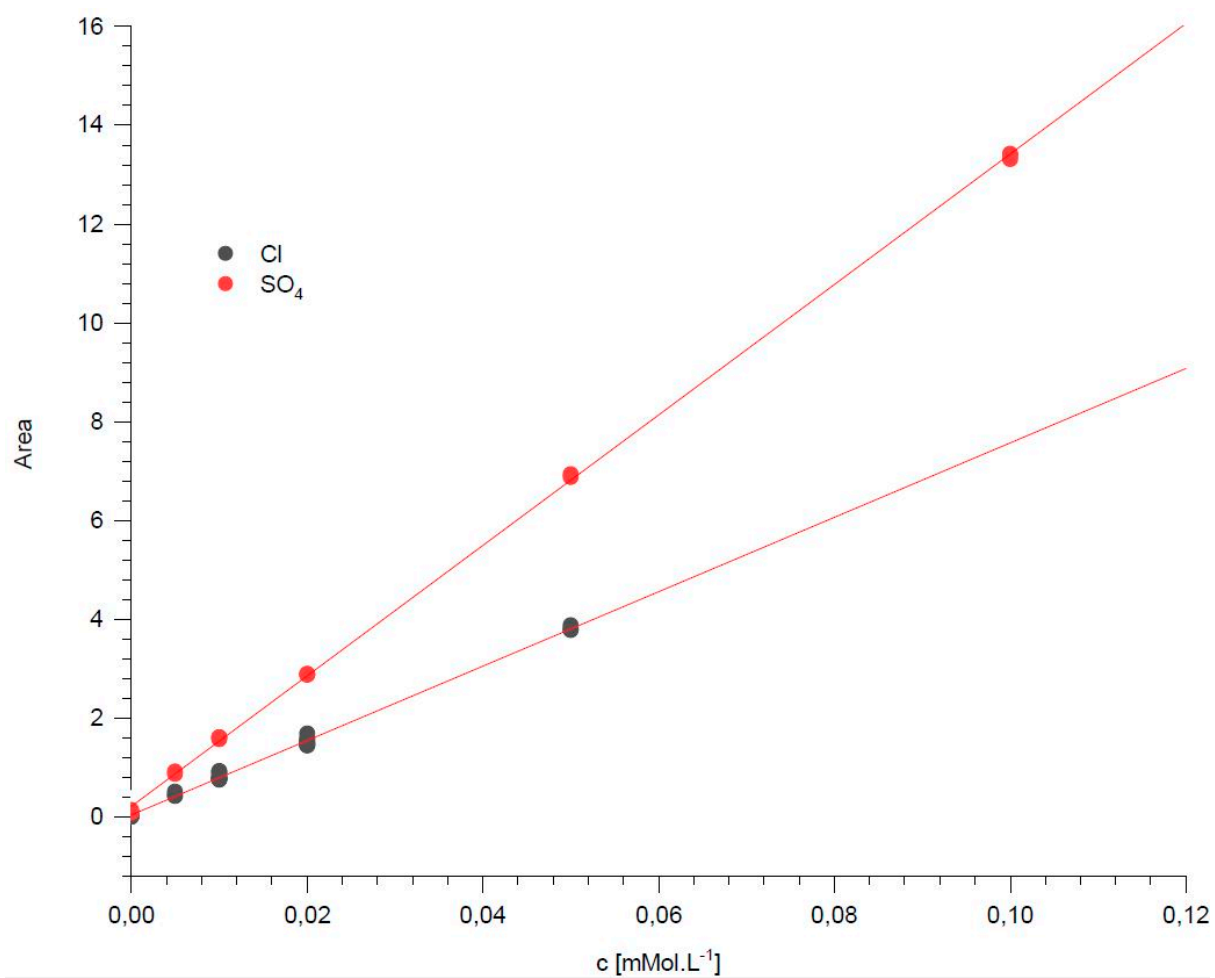

**Figure S19.** Calibration for chloride and sulfate.

## References

- S1. Pregl, F. *Die Quantitative Organische Mikroanalyse*; Julius Springer-Verlag: Berlin, 1917.
